# Supplementary material
Source: publisher site journal article supplement (https://www.spandidos-publications.com/7330/downloadSupplementary)
Supplement: Supplementary file 1 [file downloadSupplementary]

## Sheet: Table S12
Table SXII. Single-sample gene set enrichment analysis of the infiltration of 28 immune cells.
	TCGA-BJ-A28W	TCGA-DJ-A3VF	TCGA-CE-A482	TCGA-EL-A3ZS	TCGA-DJ-A3VB	TCGA-BJ-A192	TCGA-BJ-A3F0	TCGA-BJ-A28X	TCGA-EL-A3GO	TCGA-EL-A4K1	TCGA-L6-A4EU	TCGA-DJ-A2QB	TCGA-DJ-A4V4	TCGA-ET-A3DV	TCGA-EL-A3D1	TCGA-DJ-A3V0	TCGA-BJ-A28V	TCGA-EL-A3T6	TCGA-FY-A40K	TCGA-FK-A3SB	TCGA-DJ-A13S	TCGA-EM-A3SY	TCGA-EM-A22M	TCGA-EL-A3CX	TCGA-BJ-A0ZF	TCGA-EL-A3T1	TCGA-DJ-A1QQ	TCGA-DJ-A3VK	TCGA-ET-A39R	TCGA-J8-A3YG	TCGA-EL-A3T8	TCGA-EM-A4FR	TCGA-EM-A2P1	TCGA-ET-A3DT	TCGA-KS-A41F	TCGA-DJ-A3V7	TCGA-ET-A25O	TCGA-DE-A0Y3	TCGA-H2-A3RI	TCGA-FE-A235	TCGA-DJ-A1QG	TCGA-EL-A3CZ	TCGA-EM-A3ST	TCGA-BJ-A4O9	TCGA-FY-A3R9	TCGA-BJ-A0ZG	TCGA-EL-A3CY	TCGA-DJ-A3V8	TCGA-BJ-A18Y
Activated CD8 T cell	0.983985	0.683347	0.631703	0.869541	0.7807	0.716214	0.7118	0.895967	0.754387	0.738791	0.711043	0.685203	0.723447	0.580055	0.667556	0.750772	0.655492	0.9032	0.771956	0.645791	0.606019	0.802664	0.909048	0.638104	0.695037	0.866366	0.705814	0.737008	0.90994	0.687261	0.763043	0.725763	0.883837	0.921425	0.754911	0.69336	0.72169	0.762	0.79475	0.697814	0.775764	0.707354	0.813098	0.755432	0.620074	0.779359	0.908506	0.667265	0.666784
Central memory CD8 T cell	0.761599	0.822852	0.711319	0.735092	0.725962	0.830003	0.773377	0.760483	0.776932	0.647417	0.713891	0.79733	0.752907	0.89873	0.76756	0.818299	0.909374	0.703326	0.730291	0.76737	0.825882	0.765456	0.73343	0.71355	0.750219	0.780349	0.810459	0.786867	0.761935	0.805934	0.764388	0.731899	0.770324	0.771527	0.74295	0.732397	0.774396	0.739082	0.770436	0.739059	0.850944	0.821788	0.748651	0.72597	0.825152	0.761482	0.808214	0.665903	0.799101
Effector memeory CD8 T cell	0.705857	0.596166	0.577926	0.687952	0.582606	0.64303	0.590263	0.689127	0.573769	0.657888	0.581025	0.580648	0.599801	0.606108	0.567658	0.654966	0.603474	0.668861	0.71441	0.610222	0.603685	0.574897	0.713533	0.533358	0.521023	0.638691	0.645795	0.57394	0.697169	0.636322	0.634156	0.670563	0.681949	0.770864	0.580238	0.591616	0.660997	0.691323	0.667355	0.55423	0.641622	0.607129	0.620477	0.553111	0.582353	0.619422	0.704805	0.588294	0.622708
Activated CD4 T cell	0.484455	0.472534	0.260531	0.585842	0.44418	0.317803	0.090137	0.597294	0.431583	0.341299	0.34483	0.341502	0.408868	0.319686	0.19884	0.447954	0.318275	0.593452	0.394652	0.252278	0.373849	0.494867	0.454949	0.381439	0.271835	0.503726	0.39996	0.178902	0.579462	0.408107	0.34481	0.301929	0.594652	0.625188	0.274481	0.432159	0.464283	0.519781	0.408943	0.323931	0.485573	0.410261	0.262224	0.460799	0.269115	0.237011	0.646219	0.468294	0.270167
Central memory CD4 T cell	1	1	1	1	1	1	1	1	1	1	1	1	1	1	1	1	1	1	1	1	1	1	1	1	1	1	1	1	1	1	1	1	1	1	1	1	1	1	1	1	1	1	1	1	1	1	1	1	1
Effector memeory CD4 T cell	0.526771	0.465565	0.46741	0.465715	0.480518	0.583931	0.571779	0.563756	0.535672	0.46426	0.453792	0.506065	0.538296	0.625022	0.587978	0.637059	0.622071	0.46192	0.539721	0.48912	0.623399	0.683395	0.539921	0.550949	0.494693	0.388983	0.637289	0.579103	0.485557	0.575534	0.543756	0.554949	0.592795	0.487365	0.551762	0.533861	0.644822	0.607447	0.579393	0.438562	0.594592	0.590287	0.488301	0.627515	0.522071	0.528694	0.56752	0.478112	0.606598
T follicular helper cell	0.595481	0.511889	0.554225	0.632196	0.565774	0.634122	0.524797	0.630951	0.438952	0.528231	0.45687	0.597208	0.562294	0.586721	0.519202	0.55012	0.594003	0.489935	0.665217	0.585294	0.651927	0.538208	0.592907	0.502162	0.545151	0.468232	0.585276	0.50779	0.600481	0.577453	0.534668	0.581026	0.517823	0.603318	0.615773	0.606834	0.630901	0.607846	0.575473	0.510555	0.641779	0.62754	0.480447	0.549108	0.579227	0.491114	0.608938	0.531114	0.634667
Gamma delta T cell	0.700258	0.608286	0.685437	0.657378	0.608185	0.744252	0.697192	0.655018	0.700633	0.661258	0.620138	0.714407	0.652241	0.819163	0.657958	0.727311	0.744531	0.605643	0.742685	0.705573	0.675691	0.747658	0.658055	0.702921	0.726668	0.543216	0.724186	0.593002	0.632246	0.715745	0.684364	0.646034	0.625909	0.644123	0.615992	0.680643	0.724409	0.720248	0.683133	0.624581	0.712669	0.761407	0.661076	0.667743	0.64731	0.680284	0.616027	0.689314	0.676535
Type 1 T helper cell	0.606151	0.505526	0.484859	0.613115	0.496636	0.616139	0.536655	0.583068	0.455696	0.540411	0.487196	0.521035	0.554157	0.574517	0.476855	0.580155	0.590155	0.559408	0.542178	0.473772	0.538414	0.524183	0.563018	0.472069	0.487453	0.503106	0.554825	0.472629	0.600883	0.541835	0.588463	0.517712	0.555801	0.608367	0.473583	0.515186	0.573888	0.619621	0.586406	0.453449	0.554808	0.5559	0.539988	0.531667	0.47711	0.551252	0.600664	0.518642	0.580068
Type 17 T helper cell	0.350372	0.275001	0.29657	0.337826	0.348737	0.487699	0.296103	0.220682	0.319291	0.372091	0.354402	0.298444	0.373524	0.510831	0.235228	0.359979	0.493172	0.225698	0.30357	0.217084	0.378098	0.218191	0.273521	0.31977	0.201807	0.141743	0.358353	0.204574	0.352037	0.324234	0.362631	0.31785	0.290223	0.345805	0.368033	0.362517	0.394507	0.476991	0.337751	0.189802	0.28963	0.418177	0.335988	0.349514	0.297073	0.271633	0.243708	0.404101	0.380002
Type 2 T helper cell	0.515978	0.435579	0.504441	0.56629	0.470103	0.476574	0.4396	0.519019	0.536474	0.471909	0.481933	0.447413	0.44357	0.532673	0.429404	0.538377	0.678902	0.49038	0.470783	0.477544	0.526352	0.474113	0.479804	0.436871	0.485447	0.430573	0.541052	0.388069	0.590566	0.472204	0.515864	0.411406	0.48623	0.529645	0.48584	0.461227	0.589287	0.608724	0.541476	0.410333	0.556227	0.476094	0.460585	0.56519	0.412326	0.431999	0.512447	0.518957	0.48307
Regulatory T cell	0.731107	0.766902	0.64588	0.729883	0.695404	0.664787	0.555561	0.8276	0.470205	0.684538	0.672691	0.648039	0.635727	0.539684	0.69653	0.719609	0.531522	0.59834	0.72915	0.667371	0.520176	0.633498	0.801455	0.624924	0.537191	0.648348	0.710792	0.520483	0.733633	0.744192	0.614697	0.566181	0.796284	0.787702	0.602836	0.710638	0.564362	0.703259	0.618361	0.603307	0.676172	0.629446	0.533348	0.442119	0.483671	0.46684	0.877041	0.647882	0.639679
Activated B cell	0.593405	0.087188	0.0149141	0.644201	0.0752413	0.18041	0.136028	0.712761	0	0.048694	0.0866595	0.0625309	0.280339	0	0.16148	0.210375	0	0.648278	0.202895	0.12339	0	0.0316788	0.574177	0.0139605	0.0958498	0.620668	0.250698	0	0.417173	0.196456	0.186142	0.032319	0.603511	0.709522	0.11193	0	0	0.279081	0.332738	0.287328	0	0.138764	0.278801	0.153121	0	0.234319	0.722239	0.172091	0.0601969
Immature B cell	0.617151	0.271831	0.250856	0.683092	0.319167	0.308253	0.173704	0.733301	0.23403	0.270284	0.263253	0.240659	0.397153	0.147414	0.184725	0.289833	0.229581	0.645616	0.373641	0.131467	0.242944	0.245342	0.660346	0.285404	0.265638	0.617642	0.432579	0.126067	0.562625	0.348685	0.247293	0.179788	0.647552	0.722058	0.266907	0.323035	0.32133	0.456067	0.382032	0.283696	0.207197	0.321485	0.252366	0.221358	0.140913	0.242981	0.752069	0.27488	0.217257
Memory B cell	0.350437	0.247444	0.28548	0.427771	0.277043	0.330544	0.0339931	0.488246	0.228146	0.32043	0.261371	0.357685	0.398748	0.372619	0.228631	0.392508	0.341826	0.443467	0.348414	0.290122	0.363725	0.232069	0.215921	0.344148	0.160922	0.366454	0.338024	0.190823	0.298278	0.306174	0.356315	0.330499	0.299511	0.417707	0.305491	0.294517	0.508214	0.468664	0.432417	0.22516	0.22321	0.434087	0.349654	0.406762	0.31831	0.193822	0.391581	0.313542	0.350119
Natural killer cell	0.709551	0.696769	0.750555	0.754243	0.706504	0.813302	0.755122	0.742802	0.737395	0.744756	0.678151	0.744757	0.76363	0.752543	0.76503	0.806457	0.798221	0.668058	0.778758	0.799571	0.765058	0.66967	0.712303	0.82495	0.758928	0.69119	0.805391	0.726274	0.769168	0.736309	0.754232	0.744556	0.714748	0.745495	0.823395	0.759431	0.794826	0.805177	0.731958	0.733679	0.76248	0.795888	0.726234	0.783511	0.755416	0.782517	0.699916	0.719714	0.772534
CD56bright natural killer cell	0.757402	0.653559	0.744365	0.71024	0.701148	0.81421	0.778405	0.7002	0.687474	0.700988	0.674162	0.787003	0.732498	0.839584	0.724697	0.756878	0.852135	0.672254	0.728389	0.736381	0.805422	0.78193	0.698149	0.843921	0.767183	0.658148	0.73801	0.758744	0.72972	0.753719	0.783172	0.753517	0.696607	0.712645	0.77975	0.725965	0.786506	0.761867	0.750826	0.661269	0.820442	0.791183	0.738636	0.770074	0.764532	0.805609	0.643996	0.715746	0.78621
CD56dim natural killer cell	0.854862	0.730898	0.871314	0.76838	0.769968	0.871348	0.849288	0.778429	0.794124	0.81639	0.793312	0.841482	0.824703	0.881027	0.88714	0.822616	0.917131	0.741724	0.835406	0.884986	0.896274	0.94104	0.774851	0.859752	0.769966	0.644809	0.850372	0.842841	0.799788	0.817909	0.813442	0.929984	0.731187	0.736751	0.879156	0.819116	0.863298	0.839995	0.788736	0.827785	0.861005	0.842353	0.853145	0.827289	0.868842	0.817827	0.725866	0.801205	0.879399
Myeloid derived suppressor cell	0.980942	0.802767	0.737121	0.868676	0.761947	0.800495	0.62854	0.956274	0.66327	0.777759	0.800399	0.740986	0.704071	0.608517	0.758277	0.794255	0.584062	0.806159	0.893783	0.663823	0.687794	0.780781	0.945384	0.802495	0.692964	0.86845	0.716264	0.714211	0.878839	0.780151	0.676962	0.763243	0.883077	0.928667	0.76124	0.747351	0.660352	0.736321	0.746175	0.767551	0.804619	0.723693	0.690834	0.666197	0.691877	0.644147	0.987525	0.711667	0.703005
Natural killer T cell	0.494727	0.312221	0.370551	0.460881	0.340835	0.477173	0.456526	0.465433	0.390639	0.422848	0.254983	0.437343	0.395293	0.379326	0.377801	0.485696	0.440916	0.414105	0.416962	0.377346	0.377612	0.332531	0.482413	0.338903	0.327006	0.372087	0.393946	0.310579	0.468222	0.338171	0.396665	0.433235	0.314695	0.530819	0.428684	0.32427	0.433736	0.442384	0.437	0.327527	0.440924	0.378698	0.363958	0.44002	0.299731	0.398404	0.46993	0.348935	0.415751
Activated dendritic cell	0.362236	0.410083	0.399124	0.431877	0.352631	0.570437	0.268753	0.435015	0.207593	0.379812	0.385395	0.432736	0.349908	0.380292	0.386628	0.426511	0.352752	0.35113	0.39778	0.382329	0.338574	0.394245	0.414227	0.391451	0.354358	0.185523	0.353452	0.258571	0.459086	0.45277	0.39537	0.446386	0.35542	0.3695	0.46723	0.40965	0.346828	0.514331	0.413797	0.36092	0.332834	0.357637	0.229789	0.253988	0.268013	0.240983	0.428025	0.383833	0.393452
Plasmacytoid dendritic cell	0.680125	0.683106	0.735687	0.690422	0.617765	0.747719	0.78197	0.658083	0.71669	0.704707	0.663043	0.736177	0.730103	0.806648	0.710201	0.727652	0.86062	0.725122	0.707201	0.75239	0.74579	0.74353	0.696084	0.829841	0.71741	0.709405	0.698589	0.736629	0.718207	0.711414	0.780393	0.715758	0.628776	0.693681	0.849161	0.77595	0.765307	0.770746	0.737251	0.690145	0.748727	0.749881	0.772319	0.75936	0.795331	0.759289	0.672494	0.690758	0.769918
Immature dendritic cell	0.737585	0.760248	0.748602	0.727752	0.713494	0.797606	0.8066	0.737944	0.754223	0.732703	0.738797	0.82372	0.811739	0.863143	0.734105	0.781548	0.839594	0.701974	0.788385	0.78751	0.839938	0.783342	0.701057	0.955636	0.773631	0.715842	0.768962	0.795153	0.705753	0.768101	0.777318	0.781934	0.70761	0.728877	0.842773	0.791156	0.865639	0.852698	0.755017	0.628724	0.839245	0.802165	0.701243	0.804232	0.807401	0.735366	0.726461	0.758227	0.796388
Macrophage	0.460298	0.369142	0.378951	0.46102	0.412528	0.462383	0.416326	0.490307	0.233972	0.408563	0.431703	0.40187	0.419173	0.384929	0.372723	0.473274	0.455361	0.316911	0.501398	0.319419	0.395775	0.297827	0.491023	0.293344	0.380668	0.218162	0.391842	0.289951	0.396314	0.453122	0.348319	0.393195	0.405897	0.515038	0.392838	0.378462	0.34013	0.469406	0.372507	0.318949	0.454584	0.354246	0.209885	0.207796	0.34209	0.302647	0.52237	0.393633	0.391421
Eosinophil	0.205607	0.161054	0.0972052	0.257543	0.165502	0.27665	0.0971595	0.164961	0.249969	0.115419	0.0314075	0.326587	0.18682	0.370274	0.218375	0.248565	0.388981	0.247679	0.149018	0.259106	0.439131	0.159963	0.115368	0.265577	0.221674	0.0230313	0.203545	0.253638	0.16019	0.164407	0.29176	0.340366	0.150274	0.253081	0.251064	0.175341	0.219206	0.30738	0.219292	0.229985	0.310708	0.421918	0.205404	0.202105	0.388421	0.217876	0.209812	0.215491	0.295686
Mast cell	0.330039	0.436983	0.405336	0.358278	0.325039	0.486879	0.179348	0.434765	0.357695	0.342996	0.273316	0.446741	0.289198	0.305966	0.572967	0.534826	0.297148	0.228399	0.528349	0.415503	0.397465	0.467815	0.430143	0.280853	0.503994	0.395976	0.40013	0.483083	0.318045	0.433875	0.340753	0.403001	0.434225	0.435964	0.38733	0.442389	0.455313	0.3607	0.336369	0.358744	0.415422	0.436434	0.205754	0.338509	0.319224	0.232392	0.618158	0.391757	0.299109
Monocyte	0.867891	0.72372	0.803187	0.789256	0.769151	0.901781	0.908943	0.793169	0.855865	0.778238	0.797167	0.793274	0.868671	0.952427	0.82589	0.810871	0.959417	0.827555	0.832756	0.845735	0.922287	0.880273	0.762451	0.95317	0.816871	0.79127	0.836115	0.841135	0.796042	0.785495	0.894524	0.802766	0.67337	0.773226	0.89922	0.819513	0.918288	0.862796	0.860904	0.803959	0.865502	0.902024	0.92884	0.864072	0.893935	0.931063	0.787381	0.797946	0.878886
Neutrophil	0	0	0	0	0	0	0	0	0.0633378	0	0	0	0	0.120432	0	0	0.205659	0	0	0	0.00616712	0	0	0	0	0	0	0.0152049	0	0	0	0	0	0	0	0.0700783	0.094816	0	0	0	0.14255	0	0	0	0.181246	0	0	0	0
[truncated: 453 more columns]
